# Supplementary material
Source: Springer Nature journal article supplement (https://www.springermedizin.de/resource/supplementary/13054_2013_2875_MOESM15_ESM.pdf/9714066)

**A****Hypnogram**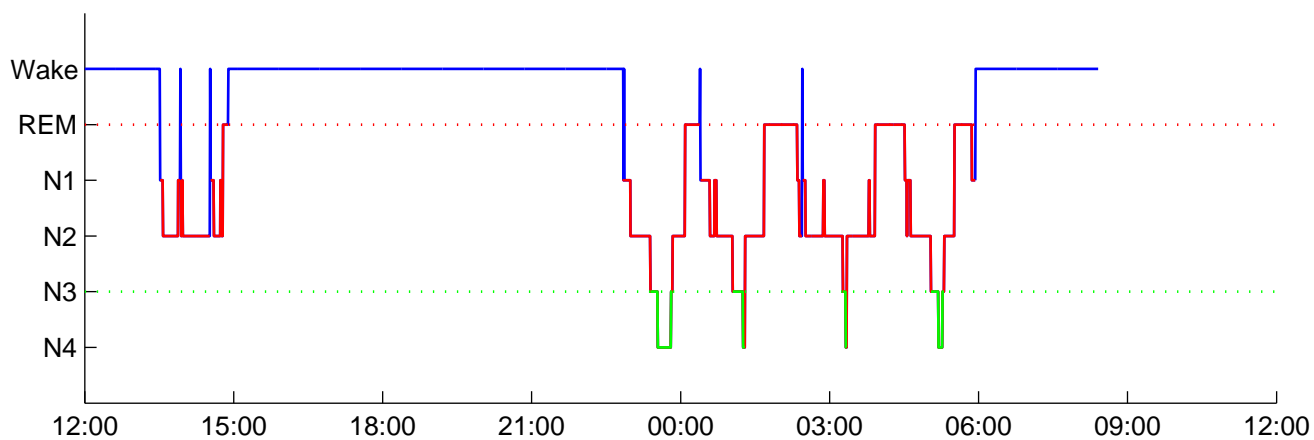**B****IDOS**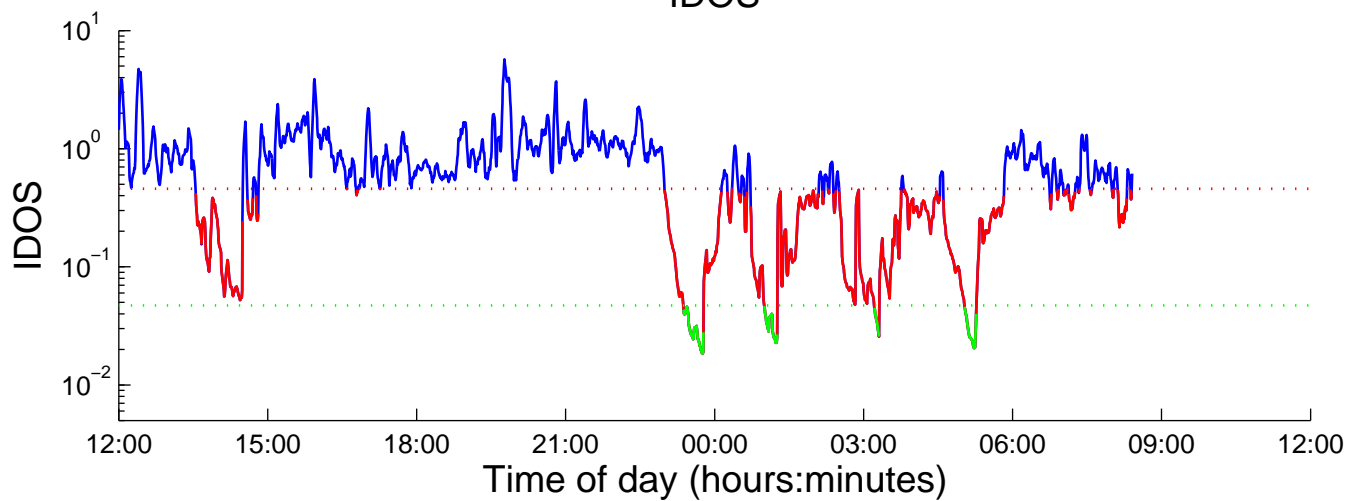

Supplement: MOESM15 [file 9714066]
